# Supplementary material for: Neuroglobin and neuroprotection: the role of natural and synthetic compounds in neuroglobin pharmacological induction
Source: PubMed Central journal article supplement — Neural Regen Res. 2021 Apr 23;16(12):2353–8. doi: 10.4103/1673-5374.300981 (PMC8374583; doi:10.4103/1673-5374.300981), 2021-04-23
Supplement: NRR-16-2353_Suppl1.pdf [file NRR-16-2353_Suppl1.pdf]

**Additional Table 1** Natural and synthetic compounds as Ngf pharmacological modulators

| Molecule                                                                                                                                        | Model                     |                       |                             | Clinical use              | Reference                                                                     |
|-------------------------------------------------------------------------------------------------------------------------------------------------|---------------------------|-----------------------|-----------------------------|---------------------------|-------------------------------------------------------------------------------|
|                                                                                                                                                 | Primary cultured neurons  | <i>In vivo</i>        | Non-neuronal cultured cells |                           |                                                                               |
| <b>Iron chelators</b>                                                                                                                           |                           |                       |                             |                           |                                                                               |
| <i>Synthetic</i>                                                                                                                                |                           |                       |                             |                           |                                                                               |
| 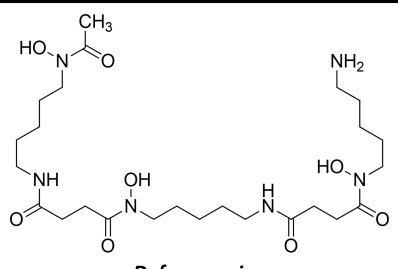 <p style="text-align: center;"><b>Deferoxamine</b></p>        | SK-N-BE cells             |                       |                             | Iron overload             | Sun et al. (2001)                                                             |
|                                                                                                                                                 | mRNA ↑                    |                       |                             |                           |                                                                               |
|                                                                                                                                                 | Ngf ↑                     |                       |                             |                           |                                                                               |
| <i>Natural</i>                                                                                                                                  |                           |                       |                             |                           |                                                                               |
|  <p style="text-align: center;"><b>Hemin</b></p>             | HN33 cells                | C57BL/6 mice (Retina) |                             | Porphyria                 | Zhu et al. (2002); Tao et al. (2018)                                          |
|                                                                                                                                                 | mRNA ↑                    |                       |                             |                           |                                                                               |
|                                                                                                                                                 | Ngf ↑                     | mRNA ↑                |                             |                           |                                                                               |
|                                                                                                                                                 |                           | Ngf ↑                 |                             |                           |                                                                               |
| <b>Hormones and derivatives</b>                                                                                                                 |                           |                       |                             |                           |                                                                               |
| <b>Steroids and analogues</b>                                                                                                                   |                           |                       |                             |                           |                                                                               |
| <i>Naturals</i>                                                                                                                                 |                           |                       |                             |                           |                                                                               |
|  <p style="text-align: center;"><b>17-beta-estradiol</b></p> | SK-N-BE cells, astrocytes |                       | MCF-7, HepG2                | Menopause hormone therapy | De Marinis et al. (2010); Fiocchetti et al. (2014); De Marinis et al. (2013a) |
|                                                                                                                                                 | mRNA ↑                    |                       |                             |                           |                                                                               |
|                                                                                                                                                 | Ngf ↑                     |                       | mRNA ↑                      |                           |                                                                               |
|                                                                                                                                                 |                           |                       | Ngf ↑                       |                           |                                                                               |

|                                                                                                                 |                                                                                   |                                   |                               |
|-----------------------------------------------------------------------------------------------------------------|-----------------------------------------------------------------------------------|-----------------------------------|-------------------------------|
| 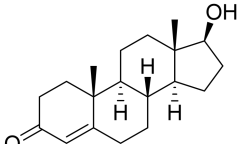<br><b>Testosterone</b>        | T98G cells<br><br>mRNA n.d.<br><br>Ngb ↑                                          | Hormonal<br>deficiency            | Toro-Urrego et al. (2016)     |
| <br><b>Fucosterol</b>          | SH-SY5Y cells<br><br>mRNA ↑<br><br>Ngb n.d.                                       | n.d.                              | Gan et al. (2019)             |
| <b>Synthetic</b>                                                                                                |                                                                                   |                                   |                               |
| <br><b>Diarylpropionitrile</b> | SN-K-BE<br><br>mRNA ↑<br><br>Ngb ↑                                                | n.d.                              | De Marinis et al. (2010)      |
| <br><b>Tibolone</b>          | T98G cells<br><br>mRNA ↑<br><br>Ngb ↑                                             | Menopause<br>hormone therapy      | Avila-Rodriguez et al. (2016) |
| <b>Thyroid hormone</b>                                                                                          |                                                                                   |                                   |                               |
| <br><b>Triiodothyronine</b>  | Male rats'<br>hippocampus,<br>cerebellum<br>and cortex<br><br>mRNA ↑<br><br>Ngb ↑ | Early stages of<br>hypothyroidism | Oliveira et al. (2015)        |
| <b>Plants derivatives</b>                                                                                       |                                                                                   |                                   |                               |
| <b>Polyphenolics compounds</b>                                                                                  |                                                                                   |                                   |                               |

|                                                                                                                     |                                          |                                                      |      |                                                       |
|---------------------------------------------------------------------------------------------------------------------|------------------------------------------|------------------------------------------------------|------|-------------------------------------------------------|
| 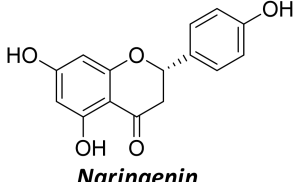<br><b>Naringenin</b>              | SK-N-BE<br><br>mRNA n.d.<br><br>Ngb ↑    | MCF-7<br><br>mRNA n.d.<br><br>Ngb no change          | n.d. | De Marinis et al. (2010);<br>Cipolletti et al. (2019) |
| <br><b>Biochanin A</b>             | N2a,<br>SKNSH<br><br>mRNA ↑<br><br>Ngb ↑ |                                                      | n.d. | Liu et al. (2016)                                     |
| <br><b>Genistein</b>               | N2a,<br>SKNSH<br><br>mRNA ↑<br><br>Ngb ↑ | MCF-7<br><br>mRNA n.d.<br><br>Ngb no change          | n.d. | Liu et al. (2016);<br>Cipolletti et al. (2019)        |
| <br><b>Polydatin</b>              | N2a,<br>SKNSH<br><br>mRNA ↑<br><br>Ngb ↑ |                                                      | n.d. | Liu et al. (2016)                                     |
| <br><b>Formononetin</b>          | N2a,<br>SKNSH<br><br>mRNA ↑<br><br>Ngb ↑ |                                                      | n.d. | Liu et al. (2016)                                     |
| <br><b>Daidzein</b>              | N2a,<br>SKNSH<br><br>mRNA ↑<br><br>Ngb ↑ | MCF-7, T47D<br><br>mRNA n.d.<br><br>Ngb ↓            | n.d. | Liu et al. (2016);<br>Montalesi et al. (2020)         |
| <br><b>Equol</b>                 |                                          | MCF-7, T47D<br><br>mRNA n.d.<br><br>Ngb ↑            | n.d. | Montalesi et al. (2020)                               |
| <br><b>o-desmethylangolensin</b> |                                          | MCF-7, cells<br><br>mRNA n.d.<br><br>0,1 μmol Ngb ↑, | n.d. | Montalesi et al. (2020)                               |

|                                                                                                                    |         |                          |                                                                      |                                  |
|--------------------------------------------------------------------------------------------------------------------|---------|--------------------------|----------------------------------------------------------------------|----------------------------------|
|                                                                                                                    |         | 1 $\mu$ mol no<br>change |                                                                      |                                  |
| 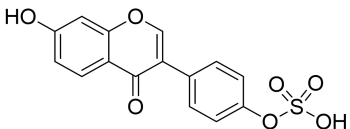<br><b>Daidzein 4-Sulfate</b>     |         | MCF-7, T47D              | mRNA n.d.<br>Ngb $\downarrow$                                        | n.d.<br>(Montalesi et al., 2020) |
| <br><b>Daidzein 7-Sulfate</b>     |         | MCF-7                    | mRNA n.d.<br>Ngb $\uparrow$                                          | n.d.<br>Montalesi et al. (2020)  |
| <br><b>Daidzein 4,7-disulfate</b> |         | MCF-7                    | mRNA n.d.<br>0,1-1 $\mu$ mol Ngb $\uparrow$<br>1 $\mu$ mol no change | n.d.<br>Montalesi et al. (2020)  |
| <br><b>8-Prenylnaringenin</b>   |         | MCF-7                    | mRNA n.d.<br>Ngb $\uparrow$                                          | n.d.<br>Cipolletti et al. (2019) |
| <br><b>Quercetin</b>            |         | MCF-7                    | mRNA n.d.<br>Ngb $\uparrow$                                          | n.d.<br>Cipolletti et al. (2019) |
| <br><b>Resveratrol</b>          | SK-N-BE | MCF-7                    | mRNA n.d.<br>Ngb $\uparrow$                                          | n.d.<br>Cipolletti et al. (2019) |

| Other plants derivatives                                                                                              |                               |                               |                                            |                                |
|-----------------------------------------------------------------------------------------------------------------------|-------------------------------|-------------------------------|--------------------------------------------|--------------------------------|
| 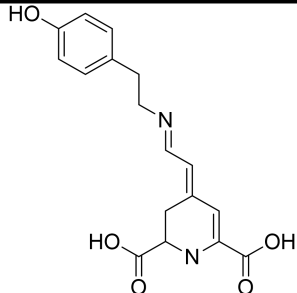 <p><b>Miraxanthin-III</b></p>       |                               |                               | Molecular docking<br>mRNA n.d.<br>Ngb n.d. | n.d.<br>Pangestu et al. (2018) |
|  <p><b>Strigol</b></p>               |                               |                               | Molecular docking<br>mRNA n.d.<br>Ngb n.d. | n.d.<br>Pangestu et al. (2018) |
| Short-chain fatty acids                                                                                               |                               |                               |                                            |                                |
| <i>Natural</i>                                                                                                        |                               |                               |                                            |                                |
|  <p><b>Trans-Cinnamic Acid</b></p> | HN33 cells<br>mRNA ↑<br>Ngb ↑ |                               |                                            | n.d.<br>Jin et al. (2011)      |
| <i>Synthetic</i>                                                                                                      |                               |                               |                                            |                                |
|  <p><b>Valproic Acid</b></p>       | HN33 cells<br>mRNA ↑<br>Ngb ↑ |                               | Anticonvulsant drug                        | Jin et al. (2011)              |
| NSAIDs                                                                                                                |                               |                               |                                            |                                |
| <i>Synthetic</i>                                                                                                      |                               |                               |                                            |                                |
|  <p><b>Ibuprofen</b></p>           |                               | AD rats<br>mRNA n.d.<br>Ngb ↑ | NSAIDs                                     | Zara et al. (2013)             |

|                                                                                                                       |                                                                                             |                              |                                |
|-----------------------------------------------------------------------------------------------------------------------|---------------------------------------------------------------------------------------------|------------------------------|--------------------------------|
| 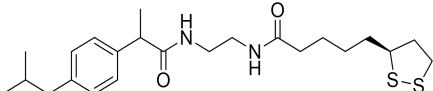 <p><b>Ibuprofen-lipoic acid</b></p> | <p>AD rats</p> <p>mRNA n.d.</p> <p>Ngb ↑</p>                                                | <p>NSAIDs</p>                | <p>Zara et al.<br/>(2013)</p>  |
| <b>Antidiabetic</b>                                                                                                   |                                                                                             |                              |                                |
| <i>Synthetic</i>                                                                                                      |                                                                                             |                              |                                |
|  <p><b>Metformin</b></p>             | <p>Wistar rats with<br/>alcohol-induced<br/>neurotoxicity</p> <p>mRNA n.d.</p> <p>Ngb ↑</p> | <p>Antidiabetic<br/>drug</p> | <p>Bonea et al.<br/>(2020)</p> |

AD: Alzheimer's disease; n.d.: not detected; Ngb: neuroglobin; NSAIDs: nonsteroidal anti-inflammatory drugs
